# Supplementary material for: Lipid-Glycoadjuvant@AuNPs Inhibits Tumor Gowth and Regulates Tumor Microenvironments by Tumor-Specific CTL-Ferived IFNγ
Source: Research Square preprint supplement (doi:10.21203/rs.3.rs-746366/v1), 2021-07-29
Supplement: Supplementary file 1 [file a29012b8a7c94f07ad21bb65.docx]

Supporting Information

Lipid-glycoadjuvant@AuNPs inhibits tumor growth and regulates tumor microenvironments by tumor-specific CTL-derived IFNγ

Xiaojing Xu, Cheng Yi, Youzhen Ge, Tianyun Feng, Mengjie Liu, Cenhao Wu, Xiang Chen, Jun Zou*, Weidong Zhang*, Lixiang Zhao*

Figure S1. The 1H-NMR spectrum of PPgMA obtained by RAFT polymerization (*M*n(NMR) =10000 g/mol).

Figure S2. The 1H-NMR spectrum of PPgMA-lipid obtained by NHS-ester reaction (*M*n(NMR) =12000 g/mol) in DMSO-d6.

Figure S3. The 1H-NMR spectrum of lipid-glycopolymer with mannose units fabricated by CuAAC reaction (*M*n(NMR) =28000 g/mol).

Figure S4. The 1H-NMR spectrum of lipid-glycopolymer with mannose and glucose as well as dopamine units fabricated by chain extension experiment (*M*n(NMR) =28000 g/mol).

Figure S5. The UV-vis absorption spectrum of the lipid-glycoadjuvant@AuNPs.

Figure S6. The particle size of lipid-glycoadjuvant@AuNPs by dynamic light scattering (DLS).


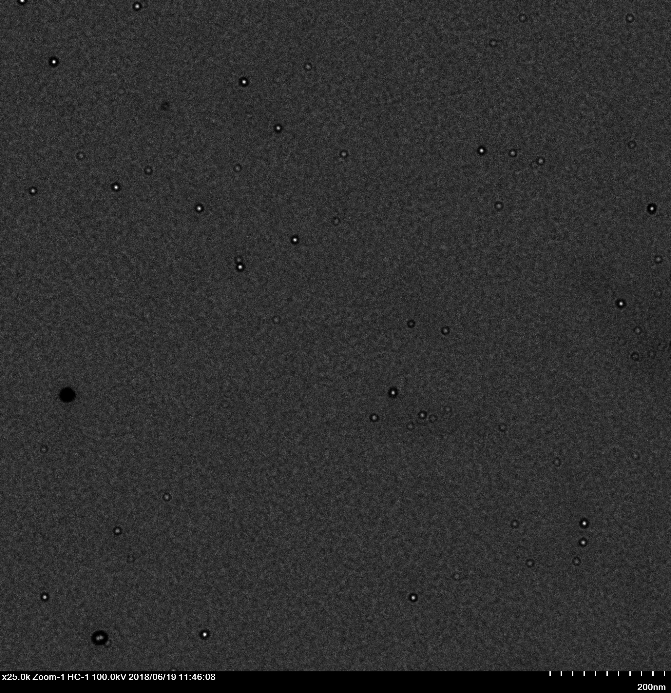


Figure S7. TEM image of lipid-glycoadjuvant@AuNPs.
